# Supplementary material for: Temporal stability and molecular persistence of the bone marrow plasma cell antibody repertoire
Source: PubMed Central journal article supplement (PMC5187582; doi:10.1038/ncomms13838), 2016-12-21
Supplement: ncomms13838-s1.pdf [file ncomms13838-s1.pdf]

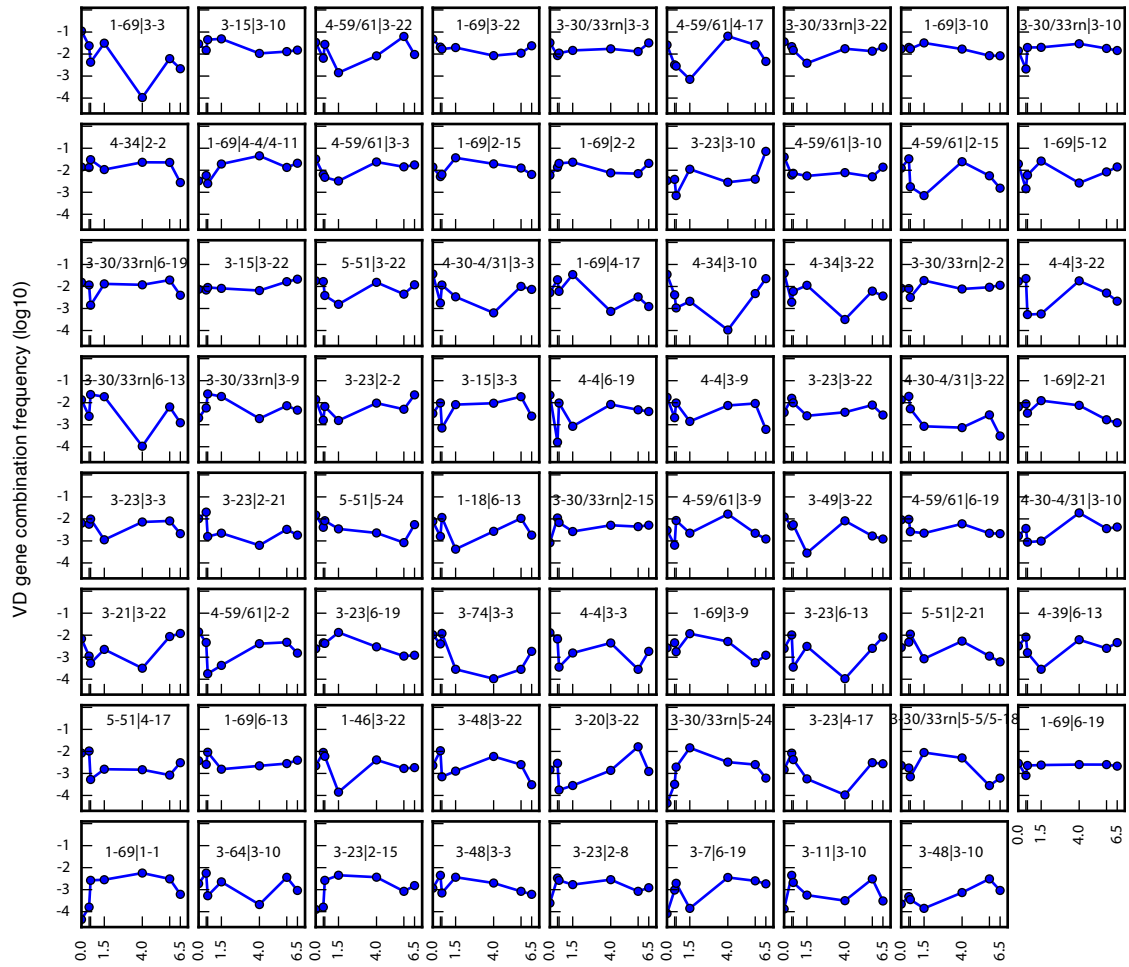

**Supplementary Figure 1.** IGH V-D combination gene use frequency of plasma cells from Donor 1. Plots are sorted by decreasing mean frequency. Only gene identifications that appear in all timepoints are shown.

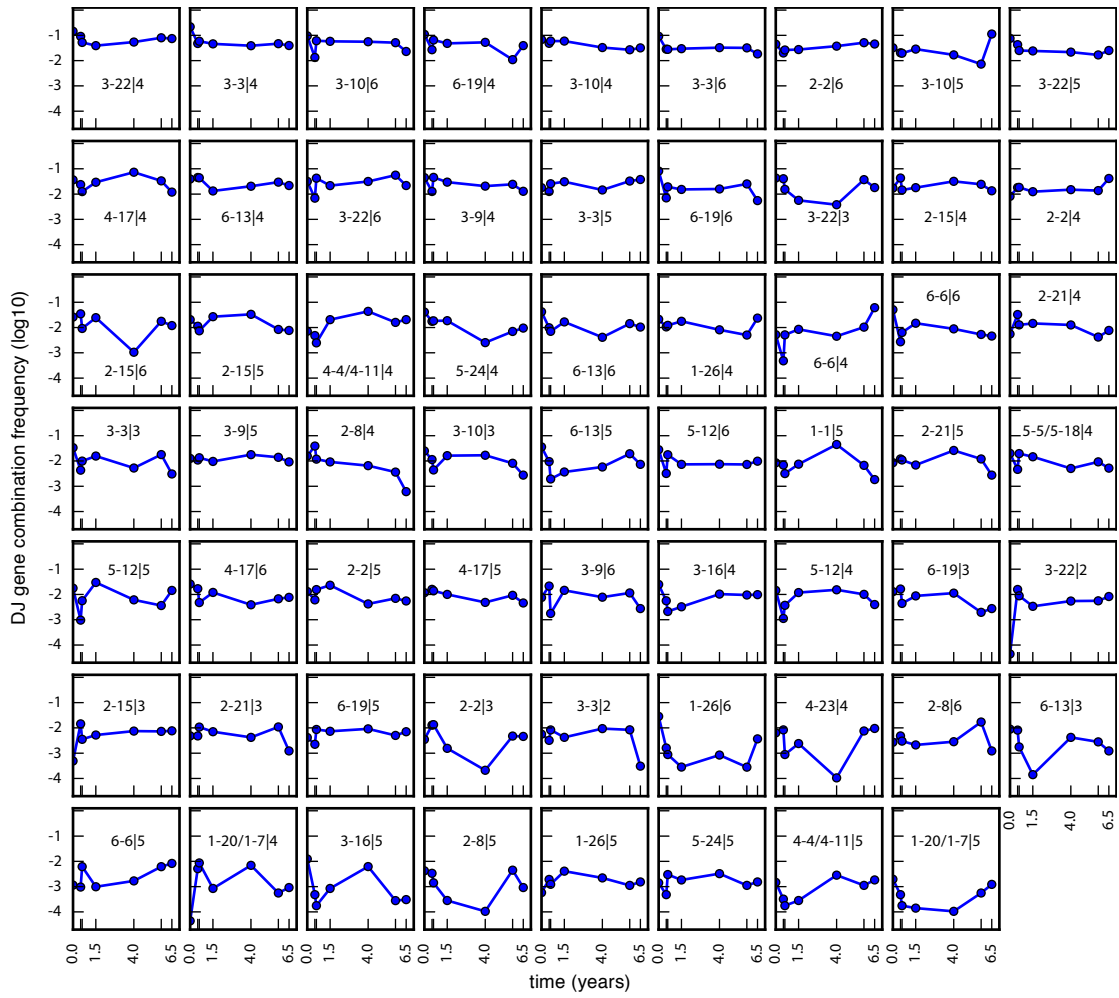

**Supplementary Figure 2.** IGH D-J usage frequencies for Donor 1 are shown. Plots are sorted by decreasing mean frequency. Only gene identifications that appear in all timepoints are shown.

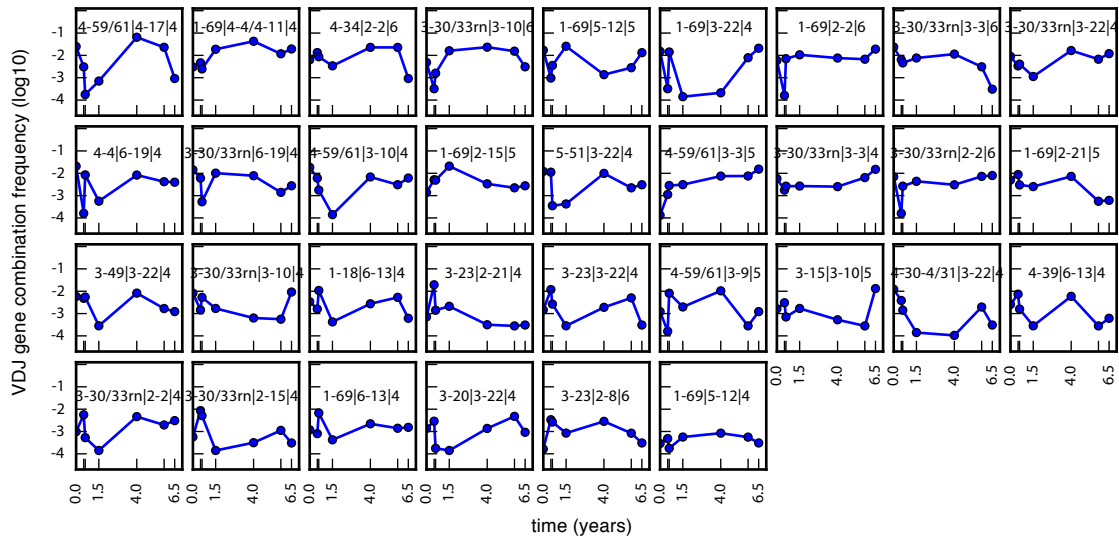

**Supplementary Figure 3.** IGH V-D-J usage frequencies for Donor 1 are shown. Plots are sorted by decreasing mean frequency. Only gene identifications that appear in all timepoints are shown.

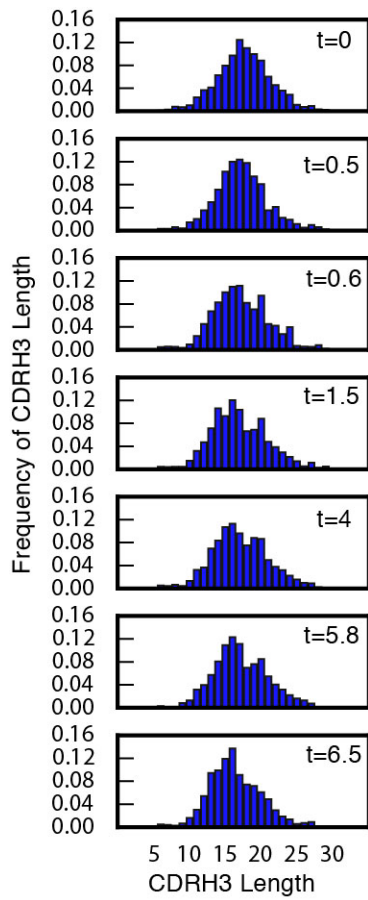

**Supplementary Figure 4.** CDR-H3 length distribution for each timepoint from Donor 1.

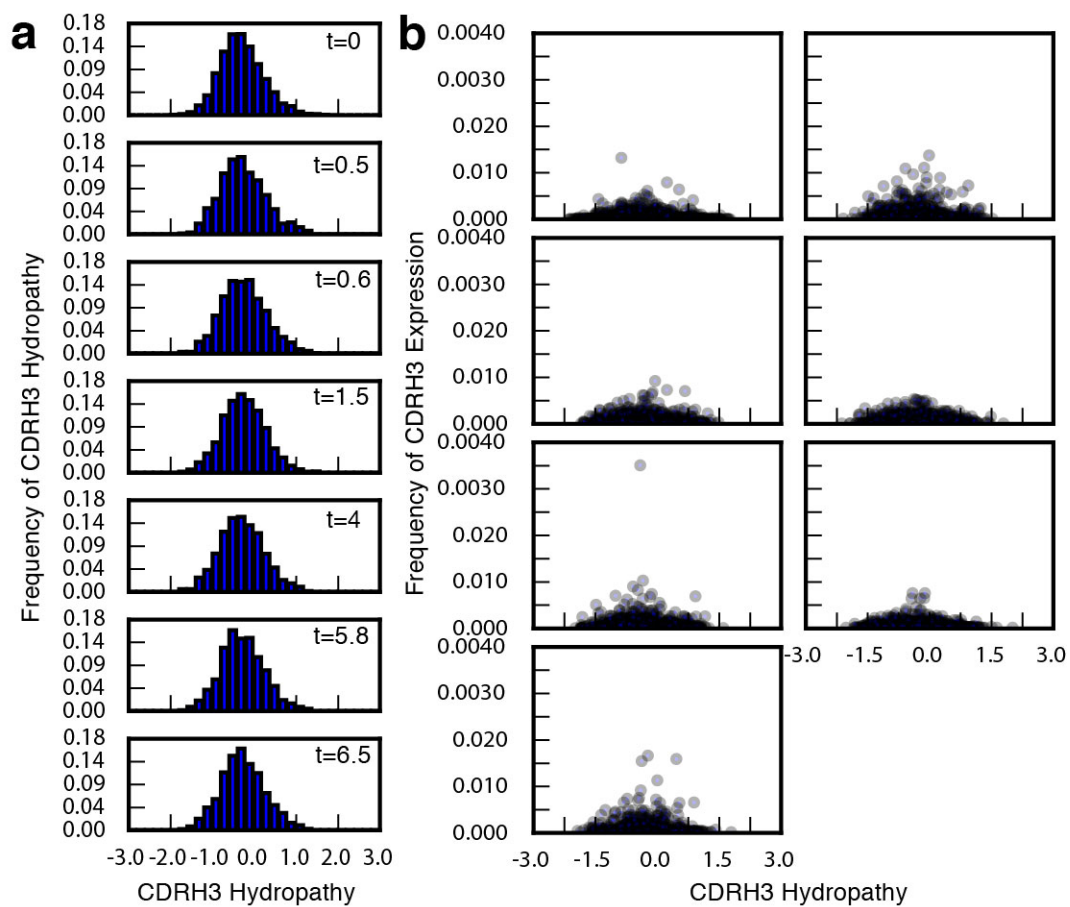

**Supplementary Figure 5.** For Donor 1: (a) CDR-H3 hydropathy distribution for each timepoint. (b) CDR-H3 frequency versus hydropathy scatter plot.

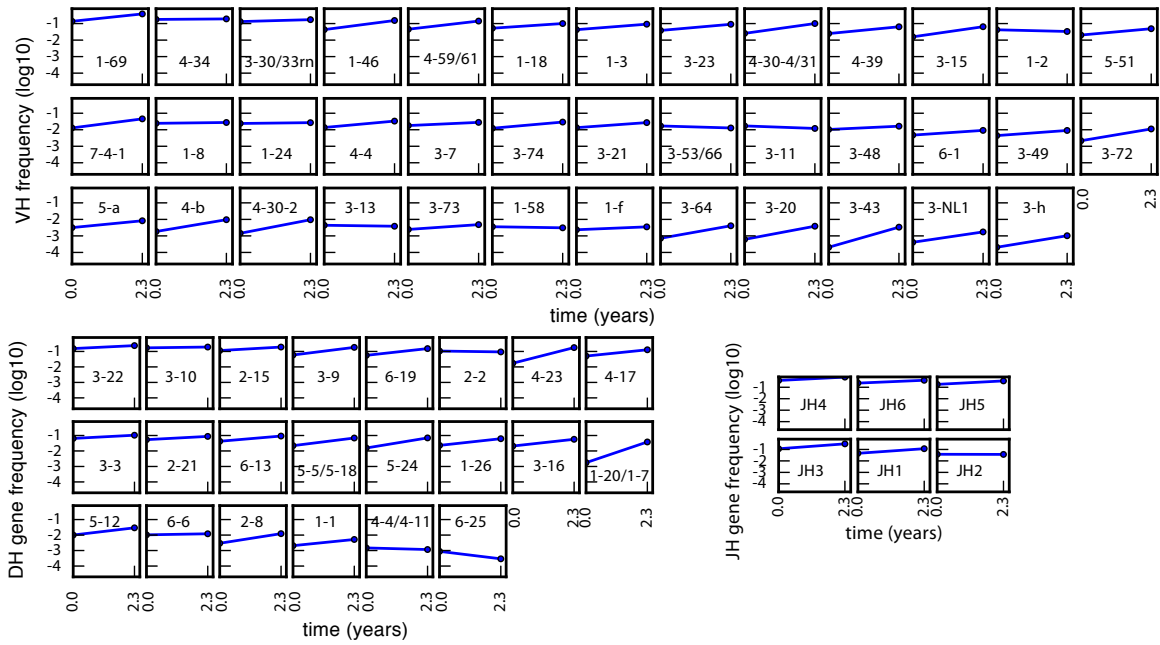

**Supplementary Figure 6.** For Donor 2: (a-c) IGHV (a), IGHD (b), and IGHD (c) gene usage frequency over time. Plots are sorted by decreasing mean frequency. Only gene identifications that appear in all timepoints are shown. (d) Mean frequency of IGHV gene use. Error bars are standard deviation.

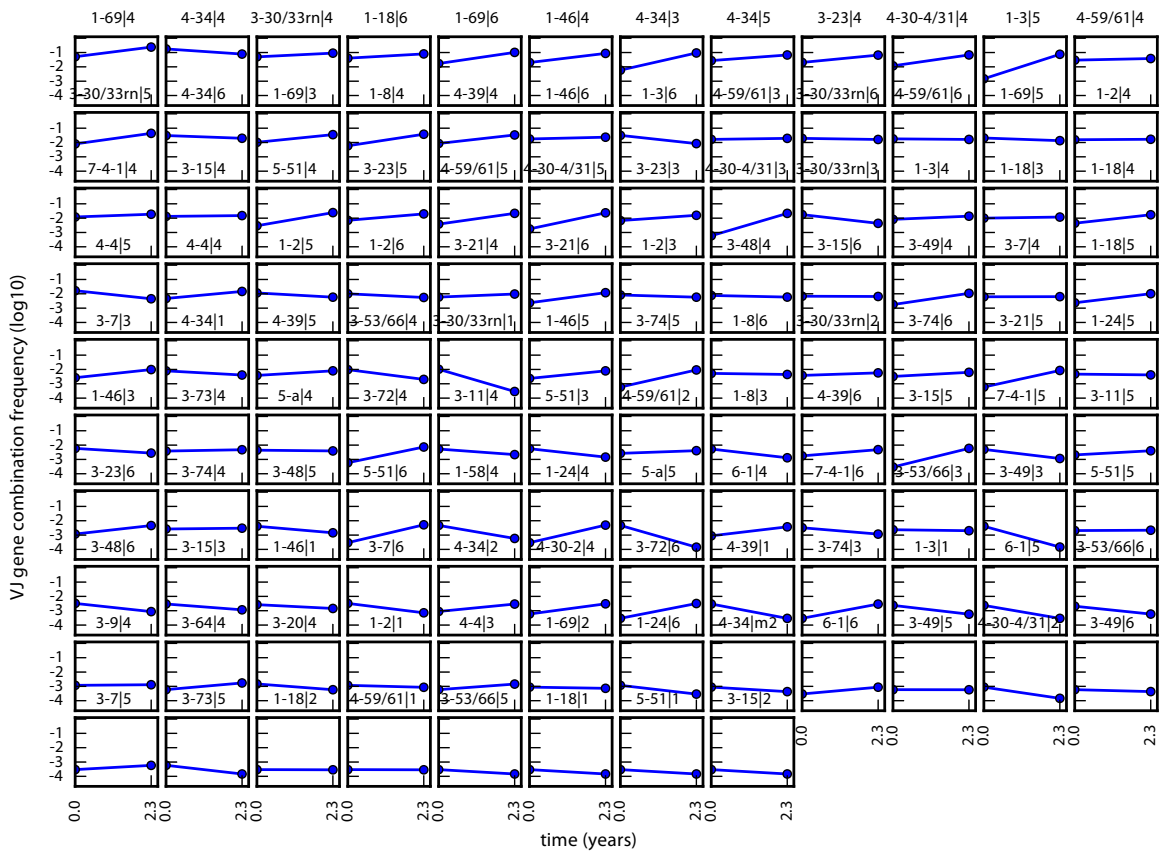

**Supplementary Figure 7.** IGH V-J usage frequencies for Donor 2 are shown. Plots are sorted by decreasing mean frequency. Only gene identifications that appear in all timepoints are shown.

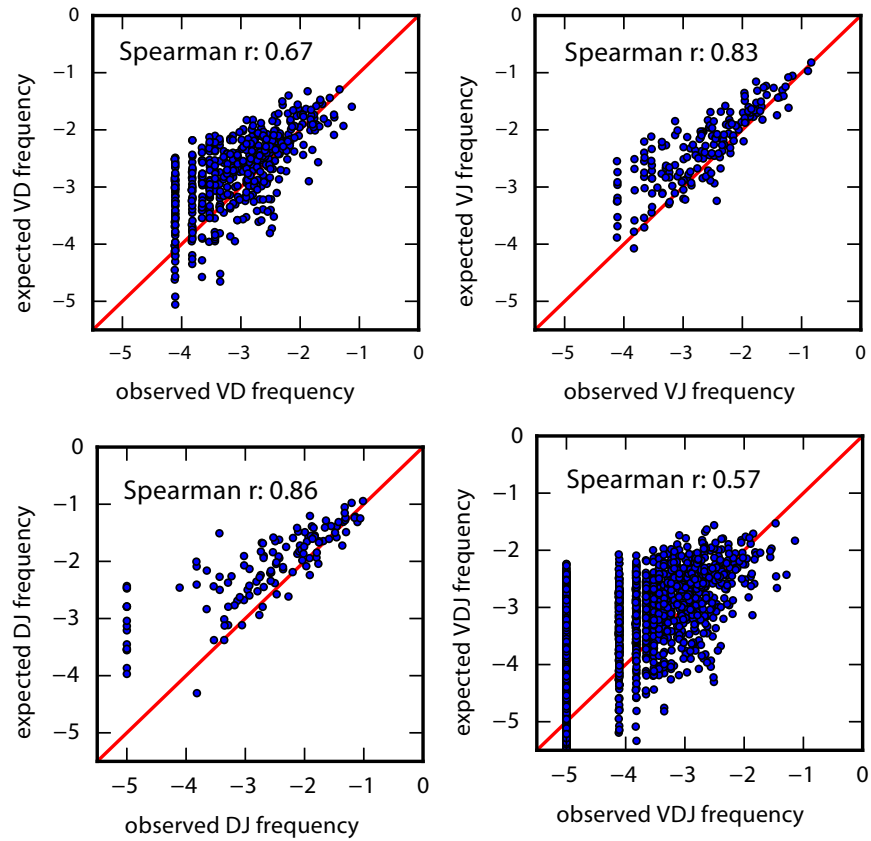

**Supplementary Figure 8.** Gene combinations among BM plasma cells are randomly assorted in Donor 2. (a-d) Spearman's rank correlation of expected versus observed IGH V-D (a), V-J (b), D-J (c), and V-D-J (d) gene combination frequencies. Expected (by random association) frequencies are calculated as products of the frequencies of the individual component genes. Diagonal lines in red indicate no difference between the expected and observed frequencies.



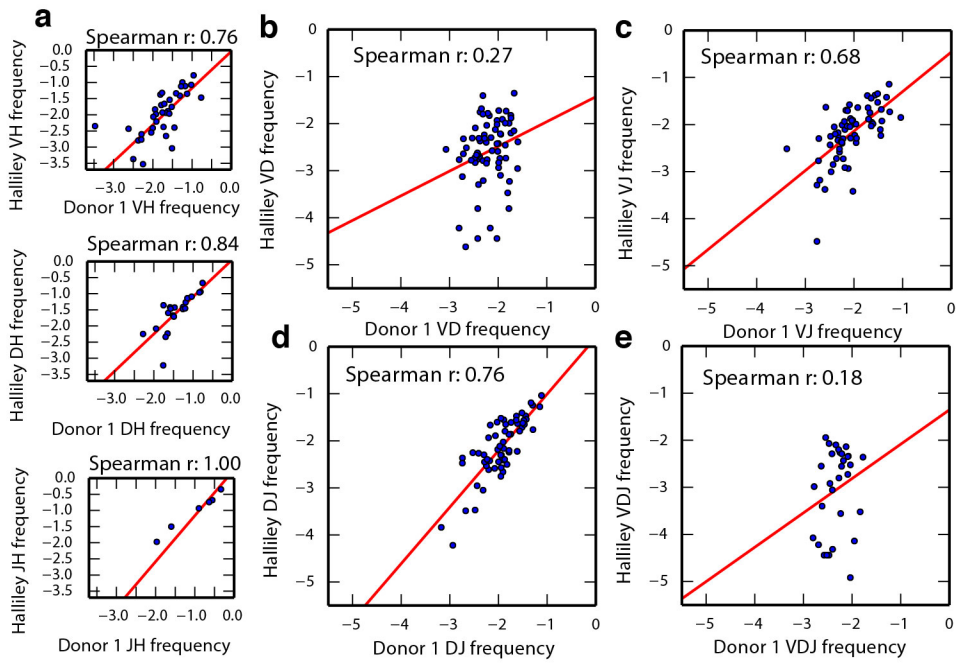

**Supplementary Figure 9:** Gene and gene combination use frequencies correlate between Donor 1 and donor from Halliley, 2015. (a) Spearman's rank correlation of individual gene frequencies between the two donors: IGHV (top), IGHD (center), and IGHJ (bottom). (b-e) Spearman's rank correlation of combination gene frequencies between the two donors: V-D (b), V-J (c), D-J (d), and V-D-J (e). (a-e) Red lines indicate least squares regression.

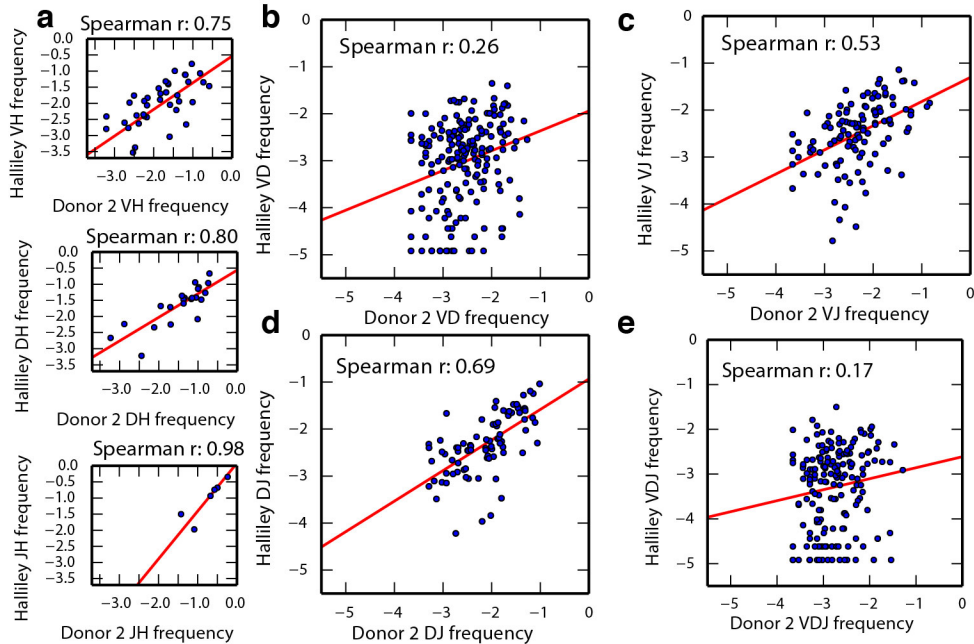

**Supplementary Figure 10.** Gene and gene combination use frequencies correlate between Donor 2 and donor from Halliley, 2015. (a) Spearman's rank correlation of individual gene frequencies between the two donors: IGHV (top), IGHD (center), and IGHJ (bottom). (b-e) Spearman's rank correlation of combination gene frequencies between the two donors: V-D (b), V-J (c), D-J (d), and V-D-J (e). (a-e) Red lines indicate least squares regression.

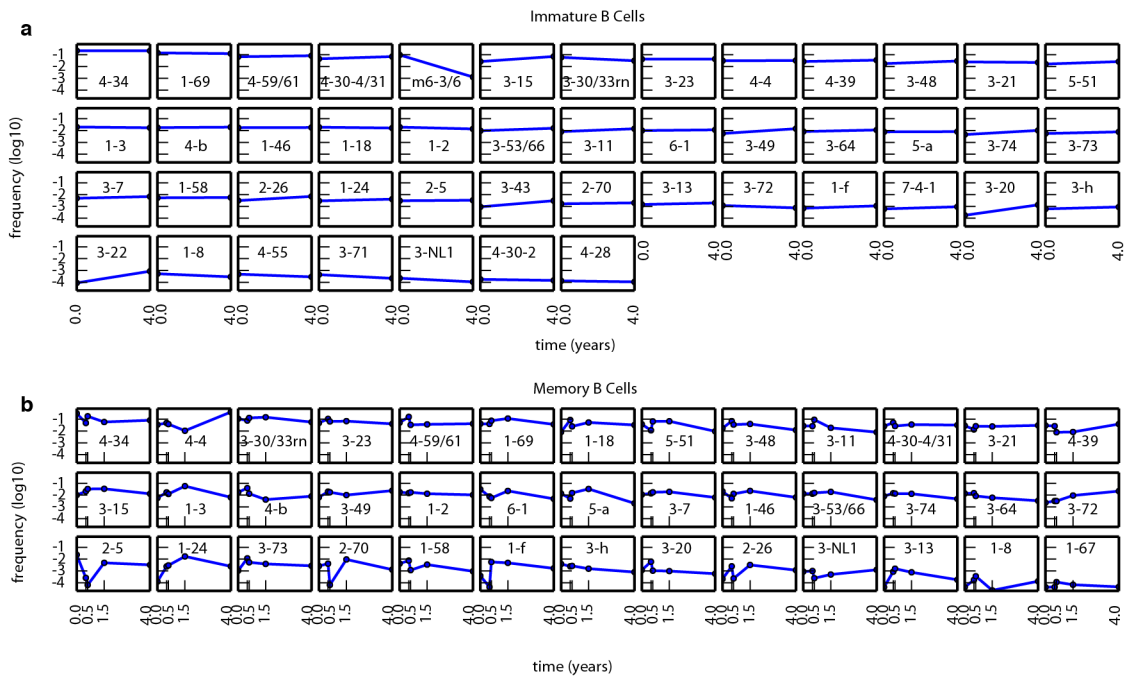

**Supplementary Figure 11.** IGHV frequencies across four years in Donor 1 in immature B and memory B cell subsets isolated from bone marrow. Plots are sorted by decreasing mean frequency.

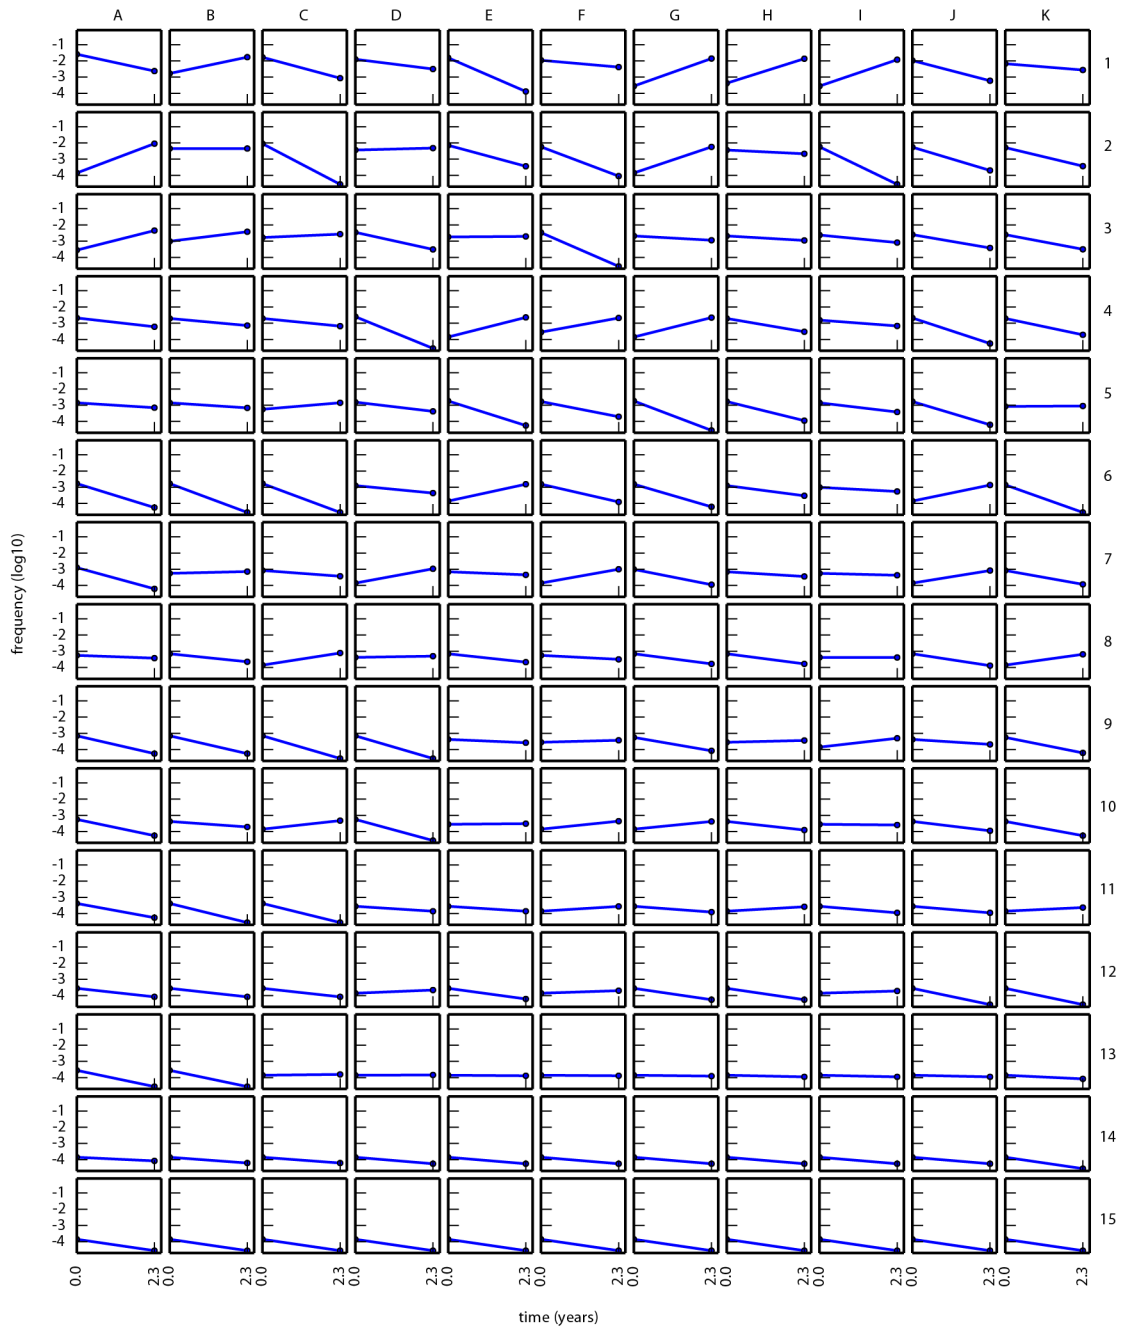

**Supplementary Figure 12.** Gene usage frequency over time of the 165 persistent clonotypes found in both timepoints in Donor 2. Plots are sorted by decreasing mean frequency. The gene names (for IGHV and IGHJ), representative amino acid sequences, and isotype information can be found in Supplementary Table 2.

| Sample ID | Donor | Age (years) | Time (years) | Cells counted | Read counts | Unique CDRH3s |
|-----------|-------|-------------|--------------|---------------|-------------|---------------|
| d1t00a    | 1     | 10.9        | 0            | 6,674         | 49,742      | 4,290         |
| d1t00b    | 1     | 10.9        | 0            | 1,298         | 110,619     | 4,338         |
| d1t05     | 1     | 11.2        | 0.5          | 2,877         | 50,468      | 2,773         |
| d1t06     | 1     | 11.5        | 0.6          | 5,047         | 39,683      | 3,265         |
| d1t15     | 1     | 12.4        | 1.5          | 5,629         | 45,949      | 3,691         |
| d1t40     | 1     | 14.9        | 4            | 1,870         | 70,692      | 3,709         |
| d1t58     | 1     | 16.5        | 5.8          | 14,307        | 20,330      | 3,276         |
| d1t65     | 1     | 17.3        | 6.5          | 6,735         | 21,996      | 2,843         |
| d2t00     | 2     | 13.5        | 0            | 3,642         | 17,726      | 2,120         |
| d2t23a    | 2     | 15.78       | 2.28         | 2,021         | 39,096      | 2,855         |
| d2t23b    | 2     | 15.78       | 2.28         | 1,100         | 37,114      | 4,999         |
| Total     |       |             |              | 51,200        | 503,415     | 38,159        |

**Supplementary Table 1.** Donor history and sequencing Information. Bone marrow (BM) plasma cells were isolated from each sample by flow cytometry. BM plasma cells are defined as CD138+ CD38++ cells from bone marrow mononuclear cells. See **Fig. 1** and Methods. Donor 1 was diagnosed at the age of 9 years with adrenal neuroblastoma metastatic to the bone marrow. Patient underwent multiagent chemotherapy consisting of high dose alkylators, then consolidated with myeloablative therapy followed by hematopoietic stem cell transplant. Because of progressive disease in bone marrow and bones at age 10, local radiation and systemic 131 I-MIBG was given followed by anti-GD2 antibody immunotherapy, 3F8+ GM-CSF+ beta-glucan+ 13-cis- retinoic acid till age 14. Patient continued in remission through age 17 years. Because of cancer therapy, patient had to be re-immunized with tetanus, *Hemophilus influenza b* (Hib), Hepatitis B, and Polio at age 12 (before sample d1t15) and boosted again with Hib, Hepatitis B and Polio at age 13 (between sample d1t15 and d1t40). MMR (mumps measles rubella) vaccine was then given at age 14 (before sample d1t40 and d1t58 and d1t65). Donor 2 was diagnosed at the age of 4 with mediastinal neuroblastoma metastatic to bone and bone marrow and received high dose multiagent chemotherapy. Tumor recurred as epidural mass in the lumbar at the age of 12 and was retreated with high dose multiagent chemotherapy followed by myeloablative therapy plus autologous hematopoietic stem cell rescue and focal radiation to the spine. Patient was treated with anti-GD2 3F8 immunotherapy plus oral etoposide till age 14, and remained in remission through age 20 years.

| Position | VH Gene       | JH Gene | Isotype | Representative CDRH3      |
|----------|---------------|---------|---------|---------------------------|
| A1       | IGHV1-69      | IGHJ1   | IGHG    | CARHPSNSWFRHFQHW          |
| B1       | IGHV1-69      | IGHJ1   | IGHA    | CARGGEQGNYYRTWEYYPYW      |
| C1       | IGHV4-34      | IGHJ4   | IGHM    | CARWIRYCSGGDCYPSMYFFDYW   |
| D1       | IGHV1-18      | IGHJ6   | IGHG    | CARDRCSGGSCYPGRPQYFYGMDVW |
| E1       | IGHV1-24      | IGHJ3   | IGHG    | CATVAITVDYDSTAYDGLDVW     |
| F1       | IGHV1-69      | IGHJ4   | IGHG    | CAKASQNYDSSGYFDCW         |
| G1       | IGHV1-3       | IGHJ6   | IGHA    | CARVTATSILGDSGRHHYYAMDVW  |
| H1       | IGHV1-46      | IGHJ3   | IGHA    | CARGLRGNLRVLAILPAGAFDMW   |
| I1       | IGHV1-46      | IGHJ6   | IGHA    | CARPLSQRGHFYYGMDVW        |
| J1       | IGHV4-34      | IGHJ4   | IGHG    | CARGRIVVAPAAMFRRRGSDYFDYW |
| K1       | IGHV1-69      | IGHJ6   | IGHG    | CASDNKIYDYGDFQYHNLAVW     |
| A2       | IGHV3-15      | IGHJ5   | IGHG    | CVTQATAATAGLAAITNFDLW     |
| B2       | IGHV1-46      | IGHJ3   | IGHA    | CARVIKPGKNDVFEIW          |
| C2       | IGHV1-3       | IGHJ5   | IGHG    | CARVVDTPFCRSSNCHNWLDPW    |
| D2       | IGHV1-69      | IGHJ5   | IGHA    | CATWGGHCTWYNWCSRVTAFSLDIW |
| E2       | IGHV3-23      | IGHJ4   | IGHA    | CAKAPLDVVTELDYW           |
| F2       | IGHV4-34      | IGHJ4   | IGHG    | CARVVNGVAPAAIFHRRGLDYFDYW |
| G2       | IGHV1-69      | IGHJ3   | IGHA    | CARDLRDMSASGGVTFDAFNIW    |
| H2       | IGHV1-69      | IGHJ4   | IGHA    | CARWDGHCSFFNWCSGRTVFPLDFW |
| I2       | IGHV1-8       | IGHJ4   | IGHG    | CARGGGSNWRRIHPVDYW        |
| J2       | IGHV1-69      | IGHJ5   | IGHG    | CARDMNDYYDPSGYSGALDHW     |
| K2       | IGHV4-34      | IGHJ4   | IGHG    | CARARVRNPTGLFRRGYPVFDSW   |
| A3       | IGHV4-30-4/31 | IGHJ4   | IGHA    | CAVMYNWNYGFDYW            |
| B3       | mIGHV6-3/6    | IGHJ4   | IGHG    | CARYVWYSSYPHYSGLDYW       |
| C3       | IGHV4-30-4/31 | IGHJ3   | IGHG    | CARVGYDGRDYVGKYGFDIW      |
| D3       | IGHV4-34      | IGHJ4   | IGHG    | CAGKRRLYSYGLGSYYYFESW     |
| E3       | IGHV3-7       | IGHJ5   | IGHM    | CARRGPTFWSGYYESYYDAW      |
| F3       | IGHV1-3       | IGHJ6   | IGHG    | CATTNRQIRAARDFYGMVDW      |
| G3       | IGHV3-53/66   | IGHJ4   | IGHG    | CARTGQDWYDIHLEHW          |
| H3       | IGHV3-30/33m  | IGHJ4   | IGHG    | CARELYAGSSGYVGYFDSW       |
| I3       | IGHV1-69      | IGHJ4   | IGHA    | CATWGGQCAWYNWCNRNTAFSLDFW |
| J3       | IGHV1-69      | IGHJ5   | IGHG    | CALGVKGFMMVHGGAKNWFESW    |
| K3       | IGHV1-18      | IGHJ3   | IGHG    | CARGTDYGDYIGAFDFW         |

**Supplementary Table 2.** The gene names (for IGHV and IGHJ), representative amino acid sequences, and isotype information for Supplementary Fig. 12 positions A1 to K3.

| Position | VH Gene       | JH Gene | Isotype | Representative CDRH3      |
|----------|---------------|---------|---------|---------------------------|
| A4       | IGHV1-3       | IGHJ6   | IGHG    | CARVTATSELRDTGRHHYYIMDVW  |
| B4       | IGHV3-15      | IGHJ6   | IGHG    | CATGSHPGRKFYYSVFW         |
| C4       | IGHV3-30/33rn | IGHJ6   | IGHG    | CARDSVHMINSYDYYFGMDVW     |
| D4       | IGHV3-30/33rn | IGHJ4   | IGHG    | CARDCSGYFCFDHW            |
| E4       | IGHV4-34      | IGHJ3   | IGHG    | CAACGGSSSCGRAFDIW         |
| F4       | IGHV5-51      | IGHJ4   | IGHG    | CARHRGDPFYHGLESRMRFFDYW   |
| G4       | IGHV4-34      | IGHJ6   | IGHG    | CARGHDFLSPPGYGLDVW        |
| H4       | IGHV1-69      | IGHJ3   | IGHG    | CARTRALADGGAFEIW          |
| I4       | IGHV3-30/33rn | IGHJ6   | IGHG    | CAKEESNHVNYYYYYAMDVW      |
| J4       | IGHV3-30/33rn | IGHJ5   | IGHG    | CARYYYDTSGPVLDLW          |
| K4       | IGHV4-34      | IGHJ4   | IGHG    | CARLVSVVPSALFHRRGLEFYFDSW |
| A15      | IGHV4-34      | IGHJ3   | IGHG    | CARRVATIARGAFDIW          |
| B5       | IGHV3-30/33rn | IGHJ4   | IGHG    | CARIHISAPGNDFDYW          |
| C5       | IGHV1-24      | IGHJ6   | IGHA    | CATGEGDAYNYGLDVW          |
| D5       | IGHV3-30/33rn | IGHJ1   | IGHG    | CARIHIAAHGNNFESW          |
| E5       | IGHV4-34      | IGHJ4   | IGHG    | CASFAGFRDKWSHLAYW         |
| F5       | IGHV1-18      | IGHJ4   | IGHG    | CARDLKGVSVSATFWGLSDDW     |
| G5       | IGHV3-11      | IGHJ4   | IGHG    | CARVHSYGDRGPFDYW          |
| H5       | IGHV4-34      | IGHJ6   | IGHG    | CVRGHPYKGLGKLYHYHYGMDVW   |
| I5       | IGHV1-69      | IGHJ5   | IGHA    | CATWGGHCTWYNWCSRVTAFSLDIW |
| J5       | IGHV1-46      | IGHJ6   | IGHG    | CARGDTMVGIDCMDVW          |
| K5       | IGHV1-69      | IGHJ6   | IGHG    | CSRSLRGRWLQSDRDYHYAMDVW   |
| A6       | IGHV4-30-4/31 | IGHJ4   | IGHG    | CARVETATDYW               |
| B6       | IGHV3-30/33rn | IGHJ4   | IGHA    | CARVFESYNLDHW             |
| C6       | IGHV4-59/61   | IGHJ2   | IGHG    | CARGRSGDYILYWYLDLW        |
| D6       | IGHV1-24      | IGHJ5   | IGHG    | CASIMGHDYGDYVETPNWFDPW    |
| E6       | IGHV1-46      | IGHJ6   | IGHA    | CARDPVGATRGGGGMDVW        |
| F6       | IGHV1-2       | IGHJ3   | IGHG    | CARGSDRGYAVLGELSAGGAFDIW  |
| G6       | IGHV1-2       | IGHJ5   | IGHM    | RATTYCNGVCPDDNWFDPW       |
| H6       | IGHV1-2       | IGHJ5   | IGHG    | CARDGRPLQFLKNWFDPW        |
| I6       | IGHV4-34      | IGHJ6   | IGHG    | CARMVVKQQLLPRFQVGYGMDVW   |
| J6       | IGHV1-18      | IGHJ1   | IGHA    | CTRDNSNYPEYFQHW           |
| K6       | IGHV1-8       | IGHJ3   | IGHM    | CARGSYDSSGHYHRIAFDIW      |

**Supplementary Table 2 (cont.)** The gene names (for IGHV and IGHJ), representative amino acid sequences, and isotype information for Supplementary Fig. 12 positions A4 to K6.

| Position | VH Gene       | JH Gene | Isotype | Representative CDRH3                 |
|----------|---------------|---------|---------|--------------------------------------|
| A7       | IGHV3-30/33rn | IGHJ6   | IGHG    | CARWAYEGTDVYYYYGMDVW                 |
| B7       | IGHV1-18      | IGHJ5   | IGHA    | CAKDLWTVTPSFNWFDSW                   |
| C7       | IGHV1-46      | IGHJ4   | IGHA    | CAREFLGPDYYGSGTKYEYW                 |
| D7       | IGHV1-69      | IGHJ6   | IGHA    | CARVPYFGSGSYENYYDMDVW                |
| E7       | IGHV1-69      | IGHJ6   | IGHA    | CARLPFFGSGSYENYYDMDVW                |
| F7       | IGHV1-69      | IGHJ6   | IGHG    | CAREGGYCTSPRCYVLEWPRNAGPDYYYYNYHMNVW |
| G7       | IGHV1-3       | IGHJ5   | IGHG    | CARSDQWLVLGDPW                       |
| H7       | IGHV4-34      | IGHJ6   | IGHG    | CARGRFKVVVFGVALEYGLDVW               |
| I7       | IGHV1-69      | IGHJ4   | IGHA    | CATTEDGRVPGYFDYW                     |
| J7       | IGHV3-30/33rn | IGHJ6   | IGHG    | CAKDEQMTATYYYYFYGMDVW                |
| K7       | IGHV1-69      | IGHJ4   | IGHA    | CVRESRKDGYGRDW                       |
| A8       | IGHV4-34      | IGHJ6   | IGHG    | CARRYDASGSHYFYFYHMDVW                |
| B8       | IGHV3-30/33rn | IGHJ4   | IGHG    | CAKGGIGFTDFDSW                       |
| C8       | IGHV1-46      | IGHJ4   | IGHA    | CAREGTSRFFQYW                        |
| D8       | IGHV3-30/33rn | IGHJ1   | IGHG    | CARIHIRAGGNFDSW                      |
| E8       | IGHV4-30-4/31 | IGHJ4   | IGHG    | CARVGFDTTGYYFDYW                     |
| F8       | IGHV1-2       | IGHJ4   | IGHG    | CAREAPNLRYYDFW                       |
| G8       | IGHV3-30/33rn | IGHJ2   | IGHA    | CAKDRGISGSYLDWYFDLW                  |
| H8       | IGHV4-34      | IGHJ4   | IGHG    | CARGVYSGSGSYDYW                      |
| I8       | IGHV1-69      | IGHJ6   | IGHA    | CAREETEYTTSSLRTTTPYNYGLDIW           |
| J8       | IGHV1-46      | IGHJ3   | IGHA    | CARVTKPGKNDVFEIW                     |
| K8       | IGHV1-18      | IGHJ5   | IGHA    | CARGHIWKELDSW                        |
| A9       | IGHV1-3       | IGHJ6   | IGHG    | CARDGRGSYGSDFYHSMDAW                 |
| B9       | IGHV1-69      | IGHJ4   | IGHA    | CARVPTTNILDSGYDYFDYW                 |
| C9       | IGHV1-46      | IGHJ4   | IGHG    | CARDISSWHEPRYYFDDW                   |
| D9       | IGHV1-8       | IGHJ5   | IGHG    | CARVYGWVGVERGLQNQHFDQW               |
| E9       | IGHV1-18      | IGHJ5   | IGHG    | CARDTPNYQLLEDFW                      |
| F9       | IGHV1-18      | IGHJ4   | IGHA    | CTRDTPNYQLLEDYW                      |
| G9       | IGHV4-39      | IGHJ4   | IGHG    | CTRDSGFYLRMGYW                       |
| H9       | IGHV3-21      | IGHJ4   | IGHA    | CARGAGGNPVGPTKEPKGGFDYW              |
| I9       | IGHV3-30/33rn | IGHJ4   | IGHG    | CARIHIRAAGNNFDNW                     |
| J9       | IGHV1-3       | IGHJ4   | IGHA    | CAREGVDMPVWPIRPSRNYFDSW              |
| K9       | IGHV1-69      | IGHJ4   | IGHA    | CARWNGHCSFFNWCSGRTVFPLDFW            |

**Supplementary Table 2 (cont.)** The gene names (for IGHV and IGHJ), representative amino acid sequences, and isotype information for Supplementary Fig. 12 positions A7 to K9.



| Position | VH Gene       | JH Gene | Isotype | Representative CDRH3       |
|----------|---------------|---------|---------|----------------------------|
| A10      | IGHV4-34      | IGHJ5   | IGHG    | CARLGVVLPAAAMFSRKGGNQFDPW  |
| B10      | IGHV4-b       | IGHJ4   | IGHA    | CARGPRTMYNSNYDYFFDYW       |
| C10      | IGHV1-3       | IGHJ6   | IGHA    | CARVTATSIVTDAGRLWYYAMDVW   |
| D10      | IGHV1-8       | IGHJ4   | -       | CARGRGAAVVRPETYW           |
| E10      | IGHV1-2       | IGHJ4   | IGHA    | CARAWNDVPPGGYW             |
| F10      | IGHV4-59/61   | IGHJ5   | IGHG    | CARSTLSYCGDSCYPLDSW        |
| G10      | IGHV1-18      | IGHJ6   | IGHG    | CVRDIFSTEWTLGYHGMDVW       |
| H10      | IGHV4-34      | IGHJ5   | IGHG    | CARLTSVVPAAAMFSRMGGDHFDPW  |
| I10      | IGHV3-30/33rn | IGHJ3   | IGHG    | CAREGSGWLAAFDIW            |
| J10      | IGHV3-23      | IGHJ4   | IGHG    | CAKKRLVGFLHHFFDSW          |
| K10      | IGHV1-69      | IGHJ4   | IGHM    | CARVMEYCSGGSCYEDFDYW       |
| A11      | IGHV1-46      | IGHJ3   | IGHG    | CARGVTLYYGESDAGDAFDIW      |
| B11      | IGHV1-18      | IGHJ5   | IGHA    | CARDRCITTSCYPWFDPW         |
| C11      | IGHV3-53/66   | IGHJ6   | IGHA    | CARAPGLQGGYYYYYGMEVW       |
| D11      | IGHV1-18      | IGHJ5   | IGHA    | CARVDFYDLLPGYCKYW          |
| E11      | IGHV3-74      | IGHJ4   | IGHA    | CVRSHTGRYDNW               |
| F11      | IGHV1-18      | IGHJ5   | IGHA    | CARDLWTVTPSFNWFESW         |
| G11      | IGHV1-69      | IGHJ5   | IGHG    | CATWGGHCTWYSWCSRVTAFSLDIW  |
| H11      | IGHV4-34      | IGHJ6   | IGHG    | CVRGPREEPAGPSHPRYFFYSAIDVW |
| I11      | IGHV1-2       | IGHJ4   | IGHA    | CATSLELRVPDDSW             |
| J11      | IGHV4-39      | IGHJ3   | IGHA    | CAREDSYKTRNTFDIW           |
| K11      | IGHV1-2       | IGHJ4   | IGHG    | CARTLEDYEDYW               |
| A12      | IGHV1-69      | IGHJ5   | IGHG    | CARGRDDYKGEVFDHW           |
| B12      | IGHV4-34      | IGHJ6   | IGHG    | CARMVIKQQPLPRFQVAYYGMDVW   |
| C12      | IGHV4-34      | IGHJ4   | IGHA    | CARGPPGYALDYW              |
| D12      | IGHV1-46      | IGHJ6   | IGHA    | CARDFRALLVRGVLRDYALDVW     |
| E12      | IGHV3-23      | IGHJ4   | IGHG    | CAKEDCSSANCYRLDYW          |
| F12      | IGHV4-59/61   | IGHJ6   | IGHA    | CARVVTLRVAGSSQYYMDTW       |
| G12      | IGHV1-3       | IGHJ6   | IGHG    | CARVTATSRVTDAGRLWFYAMDVW   |
| H12      | IGHV4-59/61   | IGHJ4   | -       | CAVNYDSSGYTRGFDSW          |
| I12      | IGHV1-69      | IGHJ3   | IGHG    | CARDGGYCSGRACHAYAFDMW      |
| J12      | IGHV1-69      | IGHJ6   | IGHG    | CARDIAVSETDYYYYFALDVW      |
| K12      | IGHV3-30/33rn | IGHJ4   | IGHA    | CASELTRVAAAGKGN DYW        |

**Supplementary Table 2 (cont.)** The gene names (for IGHV and IGHJ), representative amino acid sequences, and isotype information for Supplementary Fig. 12 positions A10 to K12.

| Position | VH Gene       | JH Gene | Isotype | Representative CDRH3         |
|----------|---------------|---------|---------|------------------------------|
| A13      | IGHV4-59/61   | IGHJ3   | IGHG    | CARPIWEPRDAFDIW              |
| B13      | IGHV1-3       | IGHJ1   | IGHA    | CARRPYCSGGSCYTGEYFQHW        |
| C13      | IGHV1-8       | IGHJ5   | IGHA    | CARGNKPDHTASSLSKNWFDPW       |
| D13      | IGHV1-18      | IGHJ6   | IGHA    | CARDDRYSSAWYLGSYYGMDVW       |
| E13      | IGHV4-39      | IGHJ5   | IGHG    | CARHYDFVWGTYRDQARNWFDPW      |
| F13      | IGHV5-51      | IGHJ3   | IGHA    | CARPEAISGFYAFDVW             |
| G13      | IGHV1-69      | IGHJ5   | IGHA    | CARWDGHCSFFNWCSGRTVFPLDFW    |
| H13      | IGHV1-69      | IGHJ4   | IGHA    | CASAGGDDIFAVVTYYW            |
| I13      | IGHV3-11      | IGHJ4   | IGHM    | CARGLRGYSYGLSDYW             |
| J13      | IGHV4-4       | IGHJ4   | IGHM    | RASRRVGATFYW                 |
| K13      | IGHV1-18      | IGHJ4   | IGHA    | CARVQNSIFGVFIPYHLDSW         |
| A14      | IGHV4-34      | IGHJ5   | IGHA    | CARWIRYCSGGDCYPSMYFDSW       |
| B14      | IGHV1-2       | IGHJ6   | IGHA    | CFRETQRGYGMDVW               |
| C14      | IGHV3-15      | IGHJ6   | -       | CATGSHPGRKVLHGSSVW           |
| D14      | IGHV1-69      | IGHJ4   | IGHA    | CARESGDGYNPKRAHVFDYW         |
| E14      | IGHV1-69      | IGHJ3   | IGHA    | CASHQPKNYYDSSSYRAFDIW        |
| F14      | IGHV1-3       | IGHJ5   | IGHG    | CAREPVPHQLLYWFDPW            |
| G14      | IGHV4-34      | IGHJ4   | IGHG    | CARGRIVVASAALFRRRGSDYFDYW    |
| H14      | IGHV4-34      | IGHJ4   | IGHA    | CARLVSVVQPAALFHRRGLDYIDFW    |
| I14      | IGHV1-18      | IGHJ1   | IGHG    | CARGHIWKELDSW                |
| J14      | IGHV3-48      | IGHJ5   | IGHM    | CALSRDGYSHKW                 |
| K14      | IGHV4-59/61   | IGHJ6   | IGHM    | CARRSGGSHYYMDVW              |
| A15      | IGHV4-34      | IGHJ6   | IGHA    | CVRGHPYKGFGEKYYLYYYGMDVW     |
| B15      | IGHV4-34      | IGHJ4   | IGHG    | CARGQTALKPVVFGVVITRPTNNYFDYW |
| C15      | IGHV3-21      | IGHJ4   | IGHA    | CARDDGDSVAEEYW               |
| D15      | IGHV4-34      | IGHJ5   | IGHG    | CARLGVVVPVAMFSRKEGNHFDPW     |
| E15      | IGHV1-2       | IGHJ6   | IGHA    | CARDFLPPGQVATIPLWHGMDVW      |
| F15      | IGHV4-34      | IGHJ6   | IGHM    | CARGHEDYSNYYYYGMDVW          |
| G15      | IGHV1-8       | IGHJ6   | -       | CARVGGPYSIHYYMDVW            |
| H15      | IGHV1-69      | IGHJ6   | IGHG    | CARDGRGQRPTRHIIINTDWYLLW     |
| I15      | IGHV1-69      | IGHJ4   | IGHG    | CARSPVAGAYFFDYW              |
| J15      | IGHV1-69      | IGHJ1   | IGHG    | CARGGNRGVIIGPGNTYPYW         |
| K15      | IGHV4-30-4/31 | IGHJ4   | IGHG    | CARGAYFYGSGLDYW              |

**Supplementary Table 2 (cont.)** The gene names (for IGHV and IGHJ), representative amino acid sequences, and isotype information for Supplementary Fig. 12 positions A13 to K15.
